# Supplementary material for: Mechanosensing at the endoplasmic reticulum by IRE1
Source: Research Square preprint supplement (doi:10.21203/rs.3.rs-10144286/v1), 2026-07-01
Supplement: Supplementary file 1 [file 19693c87358ab43b4267c3fe.xlsx]

## Sheet: Tabelle1
Name	Type	Vendor	Cat. no.	Sequence	Remarks
Anti-IRE1alpha (14C10)	Antibody	CellSignal	3294T		1:1000 in TBST with 1% BSA. Incubate O/N at 4°C.
Anti-IRE1 (phospho S724) antibody [EPR23107-16]	Antibody	Abcam	ab243665		1:1000 in TBST with 1-5% BSA. Incubate 1-3h at room temperature.
Anti-SAPK/JNK	Antibody	CellSignal	9252		1:1000 in TBST with 5% BSA. Incubate O/N at 4°C.
Anti-p-SAPK/JNK	Antibody	CellSignal	4668		1:1000 in TBST with 5% BSA. Incubate O/N at 4°C or 1-3h at room temperature.
Anti-LMNA	Antibody	Cell Signalling	P02545
Anti-Vimentin	Antibody	CellSignal	#5741
Monoclonal Anti-Vinculin antibody	Antibody	Sigma	SAB4200080-200UL		1:1000 in TBST with 1% BSA. Incubate O/N at 4°C.
Anti-Actin	Antibody	SCBT	sc-47778		1:1000 in TBST with 1% BSA. Incubate O/N at 4°C.
Anti-Puromycin	Antibody	Biolegend	B381508		1:1000 in TBST with 1% BSA. Incubate O/N at 4°C.
Anti-Eif2α (L57A5) Mouse mAb	Antibody	CellSignal	2103S		1:1000 in TBST with 1% BSA. Incubate O/N at 4°C.
Anti-Phospho eIF2α (Ser51) (119A11) Rabbit mAb	Antibody	CellSignal	3597S		1:1000 in TBST with 1% BSA. Incubate O/N at 4°C.
Monoclonal Anti-HA antibody produced in mouse	Antibody	H9658-.2ML
Anti-rabbit IgG, HRP-linked Antibody	Antibody	Cell Signaling Technology	#7074		1:8000 in TBST with 5% Milk. Incubate 1-4h at room temperature
Anti-mouse IgG, HRP-linked Antibody	Antibody	Cell Signaling Technology	#7076		1:8000 in TBST with 5% Milk. Incubate 1-4h at room temperature
Trametinib	Drug	Selleckchem	S2673		In DMSO, 100nM, 1h Pre-incubation
Imatinib-mesylate	Drug	Sigma-Aldrich	SML1027		In DMSO, 10µM, 2h Pre-incubation
STF-083010	Drug	MedChem Express	HY-15845		In DMSO, 40µM, 30min Pre-incubation
SP600125	Drug	Selleckchem	S1460		In DMSO, 10µM, 30min Pre-incubation
KIRA6	Drug	MedChem Express	HY-19708		In DMSO, 1µM, 1-2h Pre-incubation
Nocodazole	Drug	Sigma-Aldrich	SML1665		In DMSO, 2µM, 15min Pre-incubation
Cytochalasin D	Drug	Sigma-Aldrich	C2618		In DMSO, 0.5µM, 15min Pre-incubation
Torin1	Drug	MedChem Express	HY-13003		In DMSO, 0.250 µM, 5 min pre-inc.
NSC23766	Drug	MedChem Express	HY-15723A
MK-2206	Drug	Enzo Life Sciences	#ENZCHM164-0005
FLI-06	Drug	Tocris	5172		In DMSO. 40µM, 3h Incubation
Puromycin	Drug	InvivoGen	ant-pr-1		10µg/ml, 10min Incubation
Thapsigargin	Drug	Cayman Chemical	10522		In DMSO. For IRE1 phosphorylation: 3µM, 1h Incubation. For Unfolded proteins: 6µM, 3h Incubation	1h
N-acetylcystein (NAC)	Drug	Sigma	A9165		in PBS. 5 mM, 2h Pre-incubation
AACOCF3	Drug	Sigma	A231		In DMSO (O2 sensitive), 10 µM, 1.5h Pre-incubation
Gadolinium(III)-chlorid Hexahydrat	Drug	Sigma	G7532		In H2O. 10 µM, 15min Pre-incubation
TPE-MI	Chemical	MedChem Express			50µM, 30min Incubation
HiPerfect	Chemical	Qiagen	#301707
XBP1 F	Primer			TTACGAGAGAAAACTATGGCC
XBP1 R	Primer			GGGTCCAAGTTGTCCAGAATGC
GAPDH F	Primer			TTGCCATCAATGACCCCTTCA
GAPDH R	Primer			CGCCCCACTTGATTTTGGA
Bloc1S1 F	Primer
Bloc1S1 R	Primer
Stim1 F	Primer
Stim1 R	Primer
Calcein-AM	Chemical	Biozym	B425201		10 µM, 60 min serum-free media incubation
Monarch RNAse Minikit	Kit	NEB	#T2110
Luna® Universal qPCR Master Mix	Kit	NEB	#M3003
LunaScript® RT SuperMix Kit	Kit	NEB	#E3010
Cytofix/Cytoperm™ Kit	Kit	BD	554714
GoTaq® DNA Polymerase	Kit	Promega	M300A
5X Green GoTaq® Reaction Buffer	Kit	Promega	M791A
DMEM	Cell Culture	Sigma	D5796
FCS	Cell Culture	Thermofisher	A5256701
Pen/Strep	Cell Culture	Thermofisher	15070063
Horse Serum	Cell Culture	Thermofisher	16050130
RPMI	Cell Culture	Sigma	R0883
Skeletal Muscle Cell Basal Medium	Cell Culture	Promocell	#C-23260
Skeletal Muscle Growth Medium Supplement Mix	Cell Culture	Promocell	#C-39365
Insulin, human recombinant, zinc solution	Cell Culture	Thermo Scientific	12585014
6-Aminocaproic acid,≥99% (titration), powder	Cell Culture	Sigma-Aldrich	A2504-25G
Pluronic™ F-127, 0.2 µm filtered (10% Solution in Water)	Cell Culture	Thermo Scientific	P6866
Geltrex™ LDEV-Free Reduced Growth Factor Basement Membrane Matrix	Cell Culture	Thermo Scientific	A1413202
Fibrinogen from bovine plasma,Type I-S, 65-85% protein (≥75% of protein is clottable)	Cell Culture	Sigma-Aldrich	F8630-1G
Thrombin from human plasma,lyophilized powder, ≥2,000 NIH units/mg protein (E1%/280, 18.3)	Cell Culture	Sigma-Aldrich	T6884-100UN
Insulin-Transferrin-Selenium (ITS -G) (100X)	Cell Culture	Gibco	41400045
Vimentin	siRNA	Ambion Silencer Select	s14798
Lamin A	siRNA	Dharmacon	L-004978-00-0005
Stim1	siRNA	Ambion Silencer Select	s531228
JNK1#1	siRNA	microsynth	self-designed	Sense: 5' CCAGUAAUAUAGUAGUAAA 3' Antisense: 5' UUUACUACUAUAUUACUGG 3'	Overhang [dA][dT]/[dG][dC] Targeting: 653
JNK1#2	siRNA	microsynth	self-designed	Sense: 5' CAAUUCAGUGGUCUUAUUU 3' Antisense: 5' AAAUAAGACCACUGAAUUG 3'	Overhang [dT][dT] Targeting: 1545
JNK2#1	siRNA	microsynth	self-designed	Sense: 5' CAAGAAUGGUGUUGUAAAA 3' Antisense: 5' UUUUACAACACCAUUCUUG 3'	Overhang [dG][dA]/[dC][dT] Targeting: 1382
JNK2#2	siRNA	microsynth	self-designed	Sense: 5' GAAUAUGUCUGAAGAAAAA 3' Antisense: 5' UUUUUCUUCAGACAUAUUC 3'	Overhang [dA][dA]/[dT][dG] Targeting: 1733
JNK3#1	siRNA	microsynth	self-designed	Sense: 5' CAAAUCAGACACAAUUAGA 3' Antisense: 5' UCUAAUUGUGUCUGAUUUG 3'	Overhang [dG][dA]/[dC][dT] Targeting: 2171
JNK3#2	siRNA	microsynth	self-designed	Sense: 5' AACAUUAUUAGUUUAUUAA 3' Antisense: 5' UUAAUAAACUAAUAAUGUU 3'	Overhang [dA][dT]/[dT][dT] Targeting: 879
