# Supplementary material for: Mechanosensing at the endoplasmic reticulum by IRE1
Source: Research Square preprint supplement (doi:10.21203/rs.3.rs-10144286/v1), 2026-07-01
Supplement: Supplementary file 2 [file 25ae7b0cb4d6079c9ae6505a.xlsx]

## Sheet: Tabelle1
Figure 1B
Confinement		TG	Ctrl	Conf
piRE1	Experiment 1	559488	40600	410319
	Experiment 2	750420	25897	603954
	Experiment 3	636438	151020	623238
	Experiment 4	663348	41670	1904460
IRE1	Experiment 1	1518823	2151351	2238974
	Experiment 2	1255240	1401355	1673140
	Experiment 3	1783742	1776159	2491125
	Experiment 4	1064076	951360	1436428
Normalized	Experiment 1	0.368369	0.0188719	0.183262
	Experiment 2	0.59783	0.01848	0.36097
	Experiment 3	0.356799	0.0850262	0.250183
	Experiment 4	0.623403	0.0438005	1.32583
		TG	Ctrl	Conf
	Mean	0.4866	0.0415446	0.530062
	SD	0.143659	0.0313144	0.53555
	Fold change	11.7127	1	12.7589
Figure 1C
Multiple cell lines		RPE1 Ctrl	RPE1 Conf	Fibs Ctrl	Fibs Conf	MDA Ctrl	MDA Conf	MCF7 Ctrl	MCF7 Conf	BT549 Ctrl	BT549 Conf
pIRE1	Experiment 1	295800	3689406	143808	847188	44511	329562	803616	2172207	25380	4004728
	Experiment 2	1711398	9288480	812298	3062490	770118	1784103	563880	4814070	1853367	11400588
	Experiment 3	11583	1692846	191763	510003	53001	184392	118300	2512809	2223	3747968
IRE1	Experiment 1	1021101	1189996	3889668	3010068	4151374	1857332	7229348	7147728	8964678	5529168
	Experiment 2	3801084	2361969	6970134	7231539	4779216	2780994	3403902	4769730	5365518	4788988
	Experiment 3	157920	141540	14378640	11774112	3365460	3806428	8636320	9564920	2522205	2717190
Normalized	Experiment 1	0.289687	3.10035	0.0369718	0.281451	0.010722	0.177438	0.11116	0.303902	0.00283111	0.724291
	Experiment 2	0.450239	3.93252	0.11654	0.423491	0.161139	0.641534	0.165657	1.0093	0.345422	2.38058
	Experiment 3	0.0733473	11.9602	0.0133367	0.0433156	0.0157485	0.0484423	0.013698	0.262711	0.000881372	1.37935
		RPE1 Ctrl	RPE1 Conf	Fibs Ctrl	Fibs Conf	MDA Ctrl	MDA Conf	MCF7 Ctrl	MCF7 Conf	BT549 Ctrl	BT549 Conf
	Mean	0.271091	6.33102	0.0556161	0.249419	0.0625365	0.289138	0.0968384	0.525303	0.116378	1.49474
	SD	0.189133	4.89273	0.0540687	0.192101	0.0854292	0.311925	0.0769852	0.419656	0.19836	0.834154
	Fold change	1	23.3538	1	4.48466	1	4.62351	1	5.42453	1	12.8439
Figure 1D
Compression		TG	Ctrl	Comp
peIF2a	Experiment 1	515542	23080	1241881
	Experiment 2	785214	41580	1014696
	Experiment 3	1083940	129816	1379538
	Experiment 4	2500596	148028	1951400
eIF2a	Experiment 1	2305800	1821861	2141038
	Experiment 2	1510158	1967424	3785211
	Experiment 3	2392264	2380665	1364160
	Experiment 4	1861464	1863368	2825874
Normalized	Experiment 1	0.223585	0.0126684	0.580037
	Experiment 2	0.519955	0.0211342	0.268069
	Experiment 3	0.453102	0.0545293	1.01127
	Experiment 4	1.34335	0.0794411	0.690547
		TG	Ctrl	Conf
	Mean	0.634998	0.0419432	0.637481
	SD	0.423481	0.0267139	0.26566
	Fold change	15.1395	1	15.1987
Figure 1E
Activation Time		TG	0min	5min	10min	20min	30min
pIRE1	Experiment 1	561984	84723	241459	517173	644315	1468530
	Experiment 2	3540760	41940	562320	1709721	4105160	3675920
	Experiment 3	6042988	150640	342304	1975033	2937056	5293305
IRE1	Experiment 1	1747090	1277045	1064230	1068074	1752020	1738538
	Experiment 2	3522987	3567480	2630565	4706730	4474710	5046608
	Experiment 3	1920276	1921152	2005812	2852947	1979172	2868668
Normalized	Experiment 1	0.321669	0.066343	0.226886	0.484211	0.367756	0.844692
	Experiment 2	1.00504	0.0117562	0.213764	0.36325	0.917414	0.728394
	Experiment 3	3.14694	0.0784113	0.170656	0.692278	1.48398	1.84521
		TG	0min	5min	10min	20min	30min
	Mean	1.49122	0.0521702	0.203769	0.513246	0.92305	1.13943
	SD	1.47404	0.0355159	0.0294174	0.166425	0.558135	0.613983
	Fold change	28.5837	1	3.90585	9.83793	17.6931	21.8407
Figure 1F
Relaxation Time		TG	Ctrl	Conf	Conf+20	Conf+40	Conf+60
pIRE1	Experiment 1	330136	35258	350262	682080	553436	236930
	Experiment 2	370260	138780	125940	192000	19500	43320
	Experiment 3	337883	110166	42883	109190	668415	54351
	Experiment 4		2152542	5508555	7528809	4289661	2115654
	Experiment 5	838674	43400	1193709	870885	216690	71920
IRE1	Experiment 1	1098720	2219080	2185006	2875432	1849678	1430512
	Experiment 2	2585220	2851440	1432620	1764900	1403520	2294280
	Experiment 3	6591240	8517064	3152236	6177958	6057788	5432111
	Experiment 4		5827751	5479440	5463798	6211217	5803577
	Experiment 5	964035	1408330	1902630	1016769	1384480	1785166
Normalized	Experiment 1	0.300473	0.0158886	0.160303	0.23721	0.299207	0.165626
	Experiment 2	0.143222	0.0486701	0.0879089	0.108788	0.0138936	0.0188817
	Experiment 3	0.0512624	0.0129347	0.013604	0.0176741	0.11034	0.0100055
	Experiment 4		0.369361	1.00531	1.37794	0.690631	0.364543
	Experiment 5	0.869962	0.0308166	0.627399	0.856522	0.156514	0.0402876
		TG	Ctrl	Conf	Conf+20	Conf+40	Conf+60
	Mean	0.34123	0.0955342	0.378906	0.519628	0.254117	0.119869
	SD	0.3672	0.15373	0.424278	0.581101	0.264803	0.150467
	Fold change	3.57181	1	3.96618	5.43918	2.65996	1.25472
Figure 1G
Slow Confinement		TG	Ctrl	Instant	5min	12min
pIRE1	Experiment 1	627308	617496	2107779	1743078	1533448
	Experiment 2	1603965	58944	2298200	1786530	1039080
	Experiment 3	1679518	190578	1707480	1342234	740088
IRE1	Experiment 1	947274	1819488	2073254	2153312	2202954
	Experiment 2	1946340	1912500	1755216	1706600	1777146
	Experiment 3	2715964	2369934	2849601	2448334	2385152
Normalized	Experiment 1	0.662224	0.339379	1.01665	0.809487	0.696087
	Experiment 2	0.824093	0.0308204	1.30935	1.04684	0.58469
	Experiment 3	0.618387	0.0804149	0.5992	0.548223	0.31029
		TG	Ctrl	Instant	5min	12min
	Mean	0.701568	0.150205	0.975069	0.801515	0.530356
	SD	0.10835	0.165696	0.356899	0.249402	0.198555
	Fold change	4.67075	1	6.4916	5.33615	3.53088
Figure 2B
eIF2a		TG	Ctrl	Conf
peIF2a	Experiment 1	9219616	3599136	3472992
	Experiment 2	8518980	703902	784508
	Experiment 3	9795456	2527437	4560795
	Experiment 4	7960587	1996476	1564080
eIF2a	Experiment 1	6738900	4275744	5544195
	Experiment 2	12638718	7181475	5019014
	Experiment 3	1432674	5989868	9706356
	Experiment 4	4929065	10574596	5757128
Normalized	Experiment 1	1.36812	0.841757	0.62642
	Experiment 2	0.674038	0.0980164	0.156307
	Experiment 3	6.83718	0.421952	0.469877
	Experiment 4	1.61503	0.188799	0.271677
		TG	Ctrl	Conf
	Mean	2.62359	0.387631	0.38107
	SD	2.45706	0.287584	0.180671
	Fold change	6.76827	1	0.983075
Figure 2C
Gadolinium		TG	DMSO Ctrl	DMSO Conf	Gd+3 Ctrl	Gd+3 Conf
pIRE1	Experiment 1	2832504	628524	4157904	1514246	6477705
	Experiment 2	12265137	574534	18182384	366680	9878627
	Experiment 3	1103928	90100	464277	40285	466746
IRE1	Experiment 1	4837822	4729620	6713058	8230076	7202910
	Experiment 2	6491030	10550884	11951633	12369696	13478247
	Experiment 3	843638	989640	1472146	1272204	1653641
Normalized	Experiment 1	0.585492	0.132891	0.619376	0.183989	0.899318
	Experiment 2	1.88955	0.0544536	1.52133	0.0296434	0.732931
	Experiment 3	1.30853	0.0910432	0.315374	0.0316655	0.282254
		TG
	Mean	1.26119	0.092796	0.818693	0.0817661	0.638167
	SD	0.653318	0.0392481	0.627199	0.0885337	0.31926
	Fold change	13.591	1	8.82251	0.881138	6.8771
Figure 2D
cPLA2 Inhib		TG	DMSO Ctl	DMSO Conf	AACOCF3 Ctl	AACOCF3 Conf
pIRE1	Experiment 1	4116424	707227	15108345	485138	7388073
	Experiment 2	1740096	381512	1015400	339600	711360
	Experiment 3	547319	7776	916266	150432	4090320
IRE1	Experiment 1	3149637	5799339	6466700	8164226	5483688
	Experiment 2	1884900	2700965	1789700	4339110	4506138
	Experiment 3	4584736	9218298	4966200	11146960	6508670
Normalized	Experiment 1	1.30695	0.12195	2.33633	0.0594224	1.34728
	Experiment 2	0.923177	0.14125	0.567358	0.0782649	0.157865
	Experiment 3	0.119379	0.00084354	0.1845	0.0134953	0.628442
		TG
	Mean	0.783169	0.0880145	1.0294	0.0503942	0.711196
	SD	0.60604	0.0761065	1.14791	0.0333152	0.599011
	Fold change	8.89819	1	11.6958	0.572567	8.08045
Figure 2E
Lamin A KD		siCtl TG	siCtl DMSO	siCtl Conf	siLMNA TG	siLMNA DMSO	siLMNA Conf
pIRE1	Experiment 1	134816	19488	32416	148960	6016	36096
	Experiment 2	179400	75660	212316	252928	27716	45292
	Experiment 3	1344204	145044	516852	1354896	25920	1164276
IRE1	Experiment 1	269306	833302	518852	940424	913520	230660
	Experiment 2	377468	253812	91832	450008	466180	113828
	Experiment 3	505872	740196	794592	1224972	820944	536976
Normalized	Experiment 1	0.500605	0.0233865	0.0624764	0.158397	0.00658552	0.15649
	Experiment 2	0.475272	0.298095	2.312	0.562052	0.0594534	0.397899
	Experiment 3	2.6572	0.195954	0.650462	1.10606	0.0315734	2.16821
	Mean	1.21103	0.172478	1.00831	0.608837	0.0325375	0.907532
	SD	1.25249	0.138851	1.16668	0.475562	0.0264471	1.09843
	Fold change	7.02133	1	5.84604	18.7119	1	27.8919
Figure 4E
Oleic Acid		BSA TG	BSA Ctl	BSA Conf 30min	OA TG	OA Ctl	OA Conf 30min
pIRE1
	Experiment 2	2554253	572418	2557473	6634196	1121670	915216
	Experiment 3	1026760	244660	700350	1497660	504735	167446
	Experiment 4	2315789	49096	741684	922200	30476	111499
IRE1
	Experiment 2	3058609	2869152	2361683	2763483	3328320	3225600
	Experiment 3	1174485	1199394	1319670	1807918	2376434	713744
	Experiment 4	670662	1145606	815332	1106670	1027880	779610
Normalized
	Experiment 2	0.835103	0.199508	1.0829	2.40066	0.337008	0.283735
	Experiment 3	0.874221	0.203986	0.530701	0.828389	0.212392	0.234602
	Experiment 4	3.45299	0.0428559	0.909671	0.833311	0.0296494	0.143019
		BSA TG	BSA Ctl	BSA Conf 30min	OA TG	OA Ctl	OA Conf 30min
	Mean	1.72077	0.148783	0.841092	1.35412	0.193016	0.220452
	SD	1.50027	0.0917632	0.282417	0.906336	0.154593	0.0714173
	Fold change	11.5656	1	5.65313	9.1013	1.2973	1.4817
Figure 4F
Vimentin KD		Thaps	siCtrl-	siCtrl+	siVim-	siVim+
pIRE1	Experiment 1	1224960	101835	1815084	48763	496672
	Experiment 2	552564	370543	2060974	1287832	1202130
	Experiment 3	528710	313092	1373158	594022	920244
	Experiment 4	905697	249579	498576	273630	331765
IRE1	Experiment 1	419328	985986	1089396	1347516	1790430
	Experiment 2	676513	695392	1221570	1399433	1174808
	Experiment 3	649017	1229004	1540590	1858380	1258408
	Experiment 4	785273	1333372	1630195	1467550	1759351
Normalized	Experiment 1	2.92125	0.103282	1.66614	0.0361873	0.277404
	Experiment 2	0.816783	0.532855	1.68715	0.920253	1.02326
	Experiment 3	0.814632	0.254753	0.89132	0.319645	0.731276
	Experiment 4	1.15335	0.187179	0.305838	0.186454	0.188572
		Thaps	siCtrl-	siCtrl+	siVim-	siVim+
	Mean	1.4265	0.269517	1.13761	0.365635	0.555127
	SD	1.00913	0.18617	0.666794	0.387452	0.392287
	Fold change	5.29281	1	4.22093	1.35663	2.05971
Figure 5G
JNK KIRA6
		Thapsigargin	DMSO-	DMSO+	KIRA-	KIRA+
Upper pJNK	Experiment 1	151788	19272	3518856	33484	128000
	Experiment 2	2849	888	1346128	1702	1440
	Experiment 3	15048	722	589192	3952	72879
Lower pJNK	Experiment 1	508612	17116	2629044	85844	919500
	Experiment 2	8843	3293	2234547	17205	124360
	Experiment 3	304418	6498	2471589	151962	2411637
Upper JNK	Experiment 1	71328	409365	172530	515742	705132
	Experiment 2	8926846	7473156	6893904	7910574	8979984
	Experiment 3	410080	395600	376771	516510	450630
Lower JNK	Experiment 1	818784	1383840	1359666	2437068	1735830
	Experiment 2	2165506	1936176	3801315	3210202	7832304
	Experiment 3	167420	133440	92944	171495	143730
Normalized Upper	Experiment 1	2.12803	0.0470778	20.3956	0.0649239	0.181526
	Experiment 2	0.00031915	0.000118825	0.195264	0.000215155	0.000160357
	Experiment 3	0.0366953	0.00182508	1.56379	0.00765135	0.161727
Normalized Upper	Experiment 1	0.62118	0.0123685	1.9336	0.0352243	0.529718
	Experiment 2	0.00408357	0.00170078	0.587835	0.00535948	0.0158778
	Experiment 3	1.81829	0.048696	26.5922	0.886102	16.7789
		Thapsigargin	DMSO-	DMSO+	KIRA-	KIRA+
Upper Band	Mean	0.721681	0.0163406	7.38489	0.0242635	0.114471
	SD	1.21807	0.0266329	11.2884	0.0354087	0.0994898
	Fold change	44.165	1	451.936	1.48486	7.00534
Lower Band	Mean	0.814518	0.0209218	9.70456	0.308895	5.77485
	SD	0.922426	0.0246375	14.6406	0.500098	9.53329
	Fold change	37.4399	1	594.241	20.2982	386.942
Figure 6B
Tissue pIRE1
		DMSO-	DMSO+	KIRA-	KIRA+
pIRE1	Experiment 1	85137	358479	43428	13563
	Experiment 2	492311	1580659	348750	741241
	Experiment 3	11988	264432	8769	8547
IRE1	Experiment 1	1459231	559457	920204	1122216
	Experiment 2	1548190	934170	1284870	1562112
	Experiment 3	376288	784160	684488	635427
Normalized	Experiment 1	0.0583437	0.640762	0.0471939	0.0120859
	Experiment 2	0.317991	1.69205	0.271428	0.474512
	Experiment 3	0.0318586	0.337217	0.012811	0.0134508
		DMSO-	DMSO+	KIRA-	KIRA+
	Mean	0.136065	0.890009	0.110478	0.166683
	SD	0.158109	0.710974	0.140443	0.266589
	Fold change	1	6.54108	0.811951	1.22503
Figure 6C
Tissue pJNK
Upper Band pJNK	Experiment 1	9316	256292	15810	5168
	Experiment 2	18816	437760	864	320
	Experiment 3	647289	1261718	425961	50217
Upper Band JNK	Experiment 1	2668921	2407548	2178251	2031374
	Experiment 2	906920	1204490	742805	1798580
	Experiment 3	8243235	10520182	8984454	9821727
Normalized	Experiment 1	0.00349055	0.106454	0.00725812	0.00254409
	Experiment 2	0.0207471	0.36344	0.00116316	0.000177918
	Experiment 3	0.0785237	0.119933	0.0474109	0.00511285
		DMSO-	DMSO+	KIRA-	KIRA+
	Mean	0.0342538	0.196609	0.0186107	0.00261162
	SD	0.0392978	0.144637	0.0251272	0.00246816
	Fold change	1	5.73977	0.543319	0.0762432
Lower Band pJNK	Experiment 1	15776	209304	6766	10744
	Experiment 2	29792	1342332	2944	8128
	Experiment 3	78281	1315142	20352	169461
Lower Band JNK	Experiment 1	509268	425106	577146	553150
	Experiment 2	487375	283010	255360	770175
	Experiment 3	4413472	4351618	2379117	3646746
Normalized	Experiment 1	0.0309778	0.492357	0.0117232	0.0194233
	Experiment 2	0.0611275	4.74306	0.0115288	0.0105534
	Experiment 3	0.0177368	0.302219	0.00855443	0.0464691
		DMSO-	DMSO+	KIRA-	KIRA+
	Mean	0.036614	1.84588	0.0106022	0.0254819
	SD	0.0222376	2.51083	0.00177604	0.0187087
	Fold change	1	50.4145	0.289565	0.695961
Figure 6C
Tissue Puromycin
		DMSO-	DMSO+	KIRA-	KIRA+
Puromycin	Experiment 1	4320900	5185710	2468636	765536
	Experiment 2	243376	2328720	312508	293860
Actin	Experiment 1	1433250	1220352	912000	1336026
	Experiment 2	1903539	1803906	892850	619704
Normalized	Experiment 1	3.01476	4.24936	2.70684	0.572995
	Experiment 2	0.127854	1.29093	0.350012	0.474194
		DMSO-	DMSO+	KIRA-	KIRA+
	Mean	1.57131	2.77014	1.52842	0.523594
	SD	2.04135	2.09192	1.66653	0.0698626
	Fold change	1	1.76296	0.97271	0.333223
